# Supplementary material for: Magnetic lanthanum-doped hydroxyapatite/chitosan scaffolds with endogenous stem cell-recruiting and immunomodulatory properties for bone regeneration
Source: Royal Society of Chemistry journal article supplement (doi:10.1039/d0tb00342e), 2020-01-01
Supplement: d0tb00342e1.pdf [file d0tb00342e1.pdf]

## Magnetic lanthanum-doped hydroxyapatite/chitosan scaffolds with endogenous stem cell-recruiting and immunomodulatory properties for bone regeneration

Qiyang Wang<sup>a,†</sup>, Yaqi Tang<sup>b,†</sup>, Qinfei Ke<sup>b,c</sup>, Wenjing Yin<sup>a</sup>, Changqing Zhang<sup>a</sup>, Yaping Guo<sup>b,\*</sup> and Junjie Guan<sup>a,\*</sup>

<sup>a</sup> Department of Orthopedic Surgery, Shanghai Jiao Tong University Affiliated Sixth People's Hospital, Shanghai Jiao Tong University, Shanghai 200233, China.

<sup>b</sup> The Education Ministry Key Lab of Resource Chemistry and Shanghai Key Laboratory of Rare Earth Functional Materials, Shanghai Normal University, Shanghai 200234, China. E-mail: ypguo@shnu.edu.cn

<sup>c</sup> School of Materials Science and Engineering, Shanghai Institute of Technology, Shanghai 201418, China.

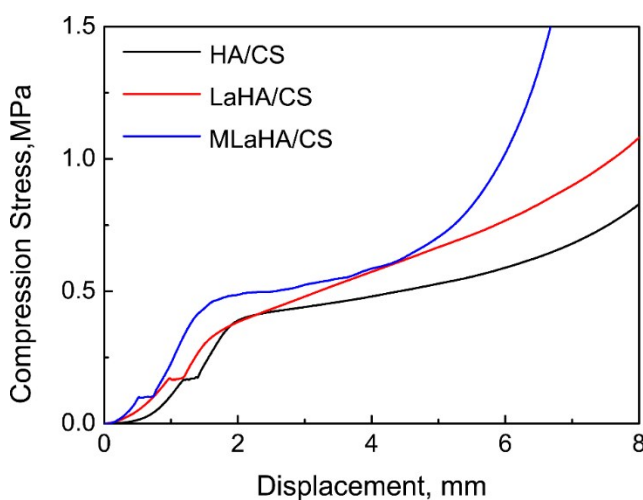

Fig. S1. The compressive properties of HA/CS, LaHA/CS and MLaHA/CS scaffolds.

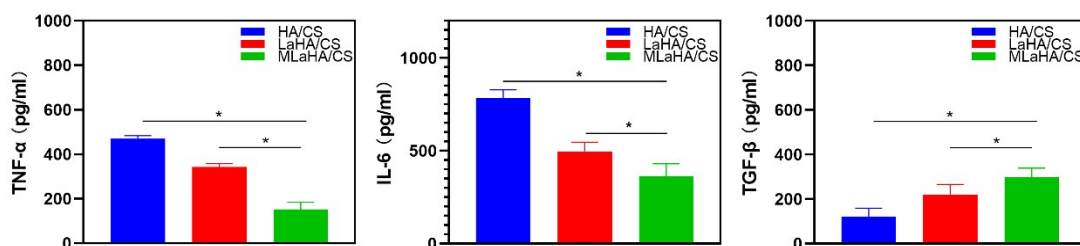

Fig.S2. Elisa results of TNF- $\alpha$ , IL-6 and TGF- $\beta$ .

### Supplementary 1

| Name   | Forward             | Reverse              |
|--------|---------------------|----------------------|
| ALP    | AACCTGTGCCCTGGAGA   | GCGAGTTTCTGCCCTGT    |
| OCN    | TTCAGAGTGAGTGCCATCC | CCATCCAGTGTGTGTCTTGT |
| RUNX-2 | CGAACAGAGCAACATCTCC | GTCAGTGCCTTTCTTGG    |
| BMP-2  | AACACAACAGCGGAA     | AGCCAGGGGAAAAGGA     |
| GAPDH  | GCAAGAGAGAGGCCCTCAG | TGTGAGGGAGATGCTCAGTG |
